# Supplementary material
Source: publisher figshare collection journal article supplement (https://sage.figshare.com/ndownloader/files/13354577)
Supplement: Supplementary file 1 [file 13354577]

| Supplemental Table: Sensitivity Analysis for Table 6 Predicting High eHealth Literacy Among Internet Users with eHEALs as a Continuous Measure (N = 101). | | | |
| --- | --- | --- | --- |
|  | Regression Coefficient | Standard  Error | p-value |
| Personal Characteristics |  |  |  |
| Ethnicity: White (vs. minority) | 0.69 | 1.58 | 0.66 |
| Computer and Internet Characteristics |  |  |  |
| Number of e-devices: 2 or more (vs. 1) | 2.41 | 1.59 | 0.13 |
| Frequency of internet use: >1/day (vs. <1/day) | -1.17 | 1.55 | 0.45 |
| No computer stress (vs. any stress) | 3.43 | 1.50 | 0.02 |
| Health Knowledge and Attitudes |  |  |  |
| Newest Vital Sign: Adequate (vs. inadequate) | 1.59 | 1.54 | 0.30 |
| Prefer to rely on doctor’s knowledge for medical decision making | -2.32 | 1.43 | 0.11 |
| Number of ways tries to find information about health conditions | 0.81 | 0.48 | 0.09 |
